# Supplementary material for: Bacteriocin-Producing Escherichia coli Q5 and C41 with Potential Probiotic Properties: In Silico, In Vitro, and In Vivo Studies
Source: MDPI journal article supplement (doi:10.3390/ijms241612636), 2023-08-10
Supplement: s1 [file s1]

**Supplementary Table S1.** General sequencing and genomic statistics for *E. coli* Q5 and C41.

|                               | <i>E. coli</i> Q5 | <i>E. coli</i> C41 |
|-------------------------------|-------------------|--------------------|
| BioProject accession no.      | PRJNA980458       |                    |
| BioSample accession no.       | SAMN35637330      | SAMN35637331       |
| SRA accession no. (ONT reads) | SRR24834173       | SRR24834172        |
| GenBank accession no.         | CP127255-CP127260 | CP127252-CP127254  |
| Total reads length (Mb)       | 867.7             | 684.3              |
| No. of reads                  | 88676             | 62481              |
| Reads N50 (kb)                | 16.4              | 19.1               |
| Total genome length, bp       | 5,267,038         | 5,165,039          |
| Chromosome length, bp         | 4,948,409         | 5,037,330          |
| GC content %                  | 51.0              | 51.3               |
| Number of CDS                 | 4945              | 4878               |
| Number of rRNA                | 22                | 22                 |
| Number of tRNA                | 89                | 89                 |
| Number of tmRNA               | 1                 | 1                  |
| Number of episomes            | 5                 | 2                  |

**Supplementary Table S2.** Description of prophages detected in the genomes of the *E. coli* Q5 and C41 strains using PHASTEST.

| Strain | Replicon   | Coordinates, bp | Phage & hypothetical proteins, % | Completeness | Similar to                            |
|--------|------------|-----------------|----------------------------------|--------------|---------------------------------------|
| Q5     | Chromosome | 1198161:1214642 | 95,20%                           | intact       | PHAGE_Burkho_phiE255_NC_009237        |
| Q5     | Chromosome | 1227480:1282768 | 95,30%                           | intact       | PHAGE_EnteromEp460_NC_019716          |
| Q5     | Chromosome | 2586661:2622614 | 97,90%                           | intact       | PHAGE_Klebsi_4LV2017_NC_047818        |
| Q5     | Chromosome | 2906727:2969625 | 92,80%                           | intact       | PHAGE_Enterolambda_NC_001416          |
| Q5     | Chromosome | 3717261:3769714 | 98,20%                           | intact       | PHAGE_EnteroSfV_NC_003444             |
| Q5     | Chromosome | 4210500:4252420 | 96,40%                           | intact       | PHAGE_Enterop88_NC_026014             |
| Q5     | pQ502      | 522:97406       | 100%                             | intact       | PHAGE_Salmon_SJ46_NC_031129           |
| C41    | Chromosome | 1072440:1086513 | 93,70%                           | intact       | PHAGE_Enterop4_NC_001609              |
| C41    | Chromosome | 1176160:1215640 | 94,50%                           | intact       | PHAGE_EnteroSfV_NC_003444             |
| C41    | Chromosome | 1581859:1593071 | 91,60%                           | intact       | PHAGE_Enterop4_NC_001609              |
| C41    | Chromosome | 1871516:1917394 | 96,40%                           | intact       | PHAGE_Enterolambda_NC_001416          |
| C41    | Chromosome | 2142922:2185862 | 98,40%                           | intact       | PHAGE_EnteroSf101_NC_027398           |
| C41    | Chromosome | 2328774:2365405 | 97,80%                           | intact       | PHAGE_EnterofiAA91_ss_NC_022750       |
| C41    | Chromosome | 2805201:2853662 | 91%                              | intact       | PHAGE_Enterolambda_NC_001416          |
| C41    | Chromosome | 3020367:3026520 | 85,70%                           | intact       | PHAGE_Escher_EC6098_NC_048874         |
| C41    | Chromosome | 3054115:3122513 | 72,90%                           | intact       | PHAGE_Enterolambda_NC_001416          |
| C41    | Chromosome | 3512532:3541014 | 97,50%                           | intact       | PHAGE_Escher_vB_EcoM_ECOO78_NC_041926 |
| C41    | Chromosome | 3541320:3570751 | 100%                             | incomplete   | PHAGE_Pectob_ZF40_NC_019522           |

**Supplementary Table S3.** Description of episomes found in the *E. coli* Q5 and C41.

| Episome | Length,<br>bp | Copy-<br>number<br>(Flye) | Coverage/<br>Identity,<br>% | Best hit (BLASTn vs nt)             | Incompatibility<br>group<br>(PlasmidFinder-<br>2.0) | Plasmid<br>transfer system             |
|---------|---------------|---------------------------|-----------------------------|-------------------------------------|-----------------------------------------------------|----------------------------------------|
| pQ501   | 137,557       | 2                         | 81/99.9                     | pH22_122286 (CP120564.1)            | IncFIB, IncFII                                      | F-type (tra)<br>conjugation<br>system  |
| pQ502   | 98,317        | 1                         | 89/99.6                     | Punavirus P1 (MH422554.1)           | p0111                                               | -                                      |
| pQ503   | 58,014        | 2                         | 100/99.7                    | pNMBU-W12E19_04<br>(CP042888.1)     | IncI2                                               | P-type (virB)<br>conjugation<br>system |
| pQ504   | 17,107        | 1                         | 100/99.9                    | pNGF1_pCol_let_like<br>(CP016009.1) | ColE1                                               | mobilization<br>system (MobC)          |
| pQ505   | 7,791         | 89                        | 100/99.9                    | unnamed plasmid 1<br>CP077681.1     | ?                                                   | mobilization<br>system<br>(MobA/MobL)  |
| pC4101  | 114,534       | 1                         | 83/99.9                     | p1 (CP083264.1)                     | IncFIB, IncFIC                                      | F-type (tra)<br>conjugation<br>system  |
| pC4102  | 13,295        | 1                         | 100/99.9                    | pFF2-1h-4 (CP097202.1)              | ColE1                                               | mobilization<br>system (MobC-<br>like) |
