# Supplementary material for: Bacteriocin-Producing Escherichia coli Q5 and C41 with Potential Probiotic Properties: In Silico, In Vitro, and In Vivo Studies
Source: MDPI journal article supplement (doi:10.3390/ijms241612636), 2023-08-10
Supplement: s1 [file s1]

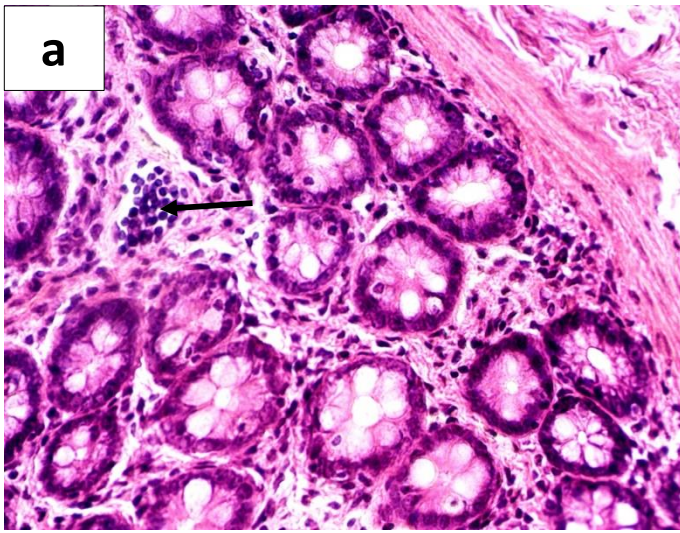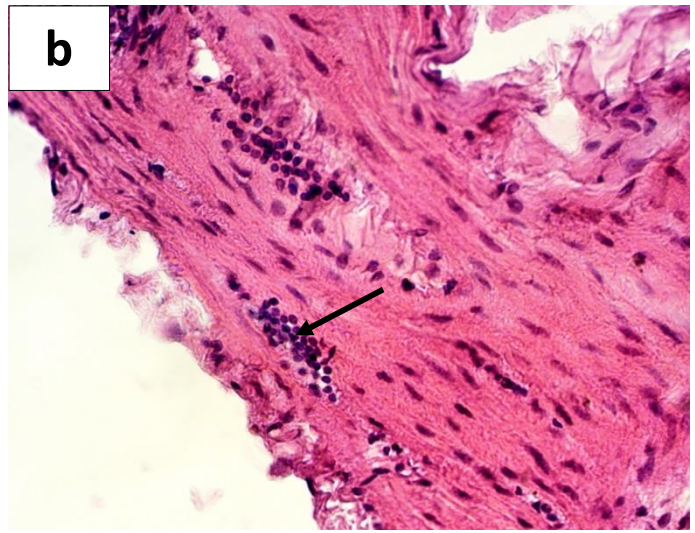

**Figure S2.** Hematoxylin-eosin stained colon sections of rats infected with *E. coli* C55 show accumulations of lymphocytes in the mucosa and submucosa layers (a, arrow,  $\times 400$ ), in the muscular layer (b, arrow,  $\times 400$ ).
