# Supplementary material for: Bacteriocin-Producing Escherichia coli Q5 and C41 with Potential Probiotic Properties: In Silico, In Vitro, and In Vivo Studies
Source: MDPI journal article supplement (doi:10.3390/ijms241612636), 2023-08-10
Supplement: s1 [file s1]

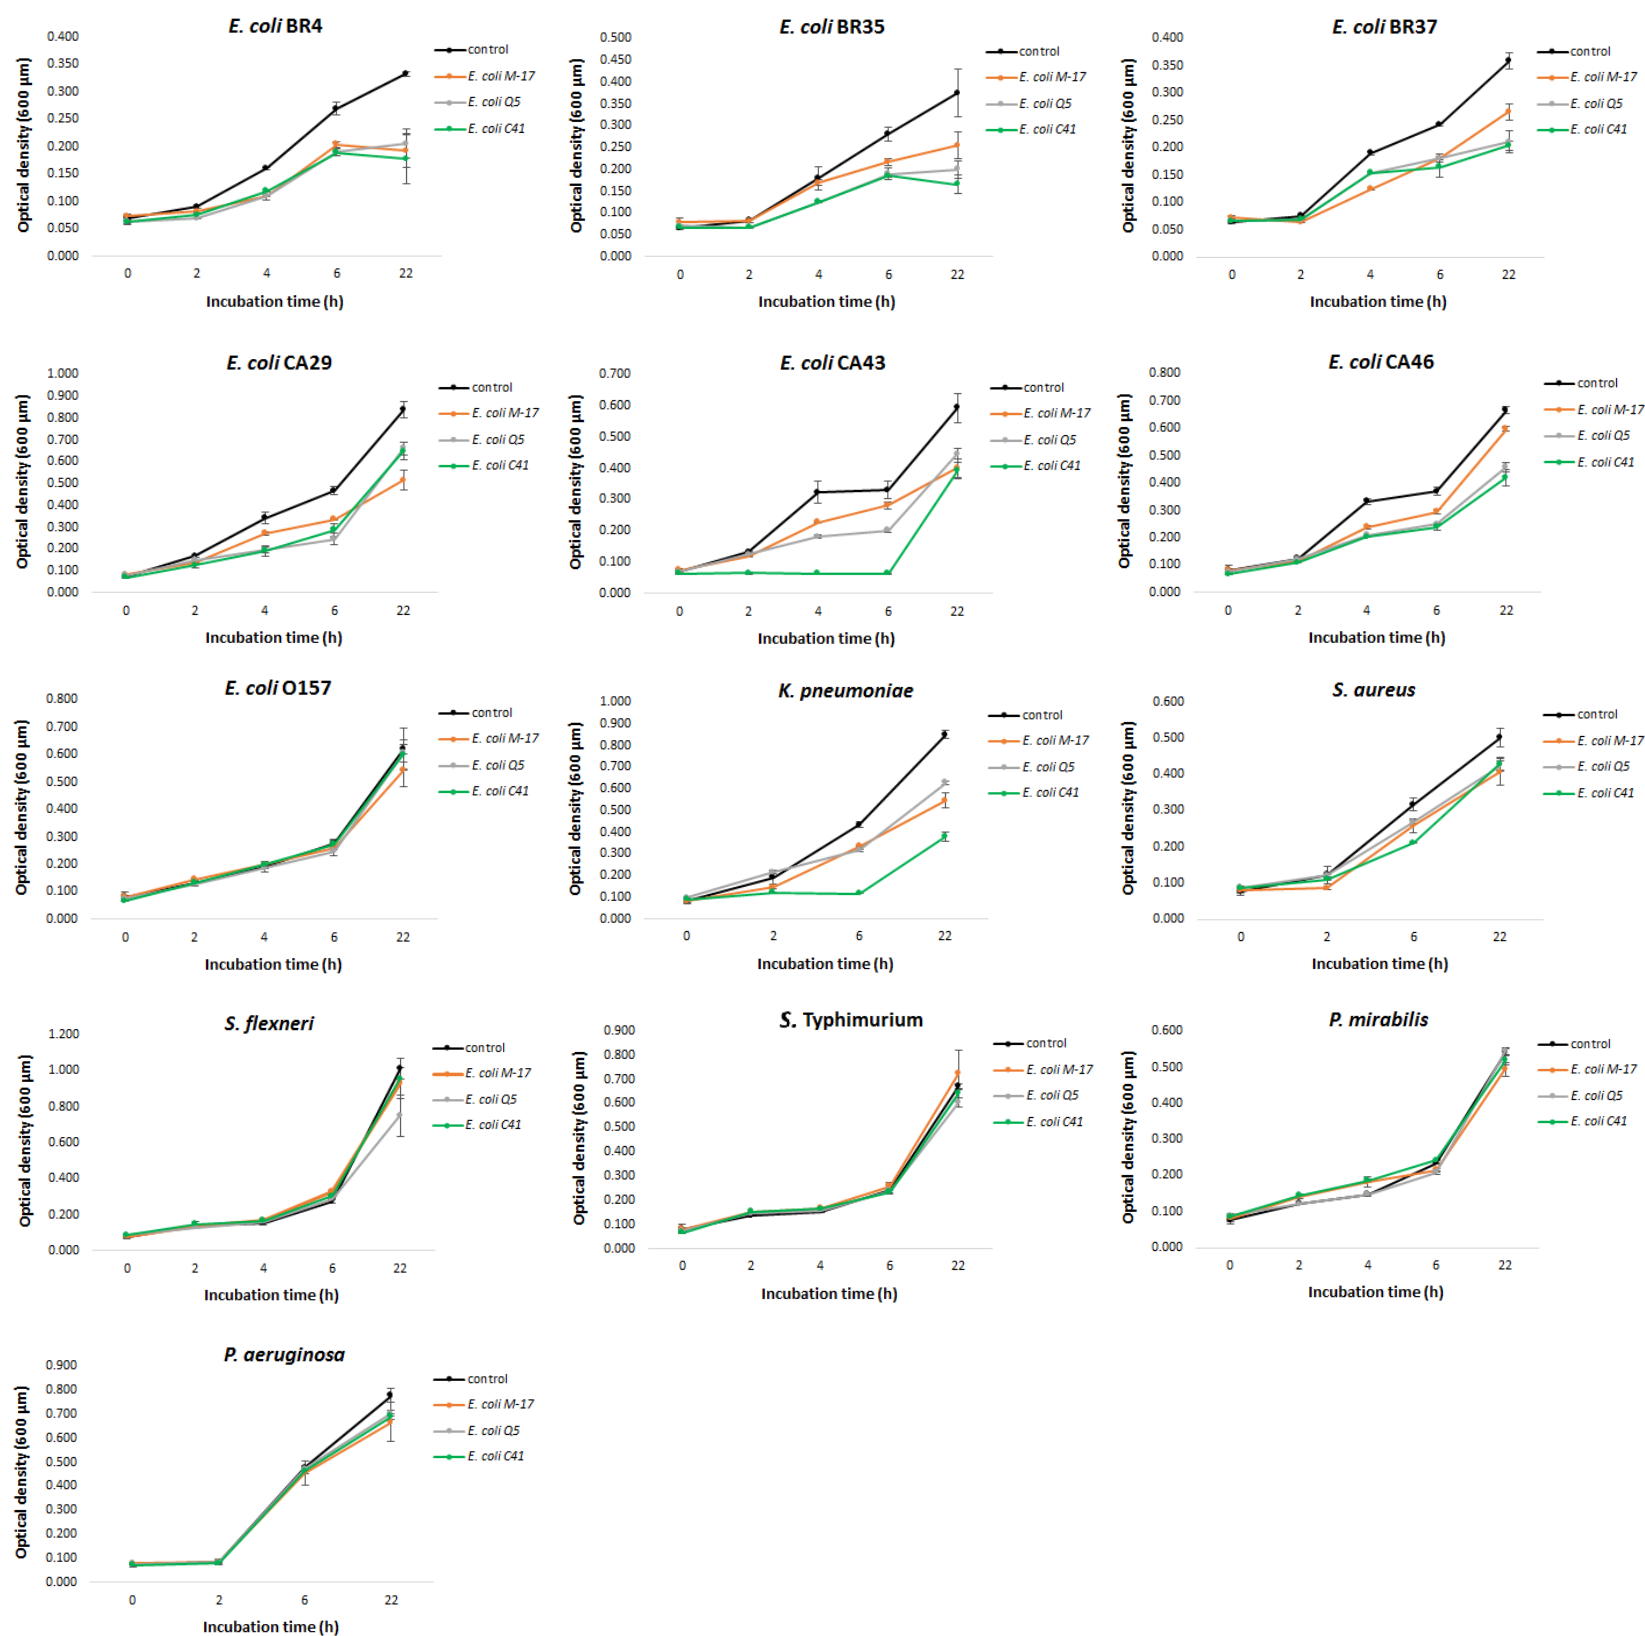

**Figure S1.** *In vitro* antimicrobial activity of cell-free supernatants of *E. coli* M-17, Q5 and C41 against indicated test strains in different times of incubation. The results are expressed as means  $\pm$  mean standard deviations.
